# Supplementary material for: Compact zinc finger base editors that edit mitochondrial or nuclear DNA in vitro and in vivo
Source: PubMed Central journal article supplement (PMC9684478; doi:10.1038/s41467-022-34784-7), 2022-11-23
Supplement: 41467_2022_34784_MOESM6_ESM.pdf [file 41467_2022_34784_MOESM6_ESM.pdf]

**Title:** Supplementary Data 1

**Description:** Sequences and primers used in this study

**Title:** Supplementary Data 2

**Description:** Experimental data for strategies to reduce ZF-DdCBE off-target editing

**Title:** Supplementary Data 3

**Description:** ZF design and cloning guide
